# Supplementary material for: N‐Terminal Pro‐B‐Type Natriuretic Peptide as a Biomarker for the Severity and Outcomes With COVID‐19 in a Nationwide Hospitalized Cohort
Source: PubMed Central journal article supplement — J Am Heart Assoc. 2021 Dec 10;10(24):e022913. doi: 10.1161/JAHA.121.022913 (PMC9075235; doi:10.1161/jaha.121.022913), 2021-12-10
Supplement: JAH3-10-e022913-s001.pdf [file JAH3-10-e022913-s001.pdf]

# **SUPPLEMENTAL MATERIAL**

**Table S1. Characteristics of Patients with an NT-proBNP and those Without an NT-proBNP or BNP value on Admission.**

| <b>Demographics</b><br>% ( <i>n</i> ) or<br>Median( <i>Q</i> <sub>1</sub> – <i>Q</i> <sub>3</sub> ) | <b>Patients<br/>Without<br/>NT-proBNP<br/>or BNP</b><br>( <i>n</i> = 13,039) | <b>Patients with<br/>NT-proBNP</b><br>( <i>n</i> = 4,675) | <b>p-value</b> |
|-----------------------------------------------------------------------------------------------------|------------------------------------------------------------------------------|-----------------------------------------------------------|----------------|
| Male                                                                                                | 53.2% (6,941)                                                                | 54.8% (2563)                                              | 0.064          |
| Age (years)                                                                                         | 60.0 (45.0 – 73.0)                                                           | 66.0 (54.0 – 77.0)                                        | <0.001         |
| BMI (kg/m <sup>2</sup> )                                                                            | 29.1 (24.5 – 34.5)                                                           | 29.5 (25.2 – 35.1)                                        | 0.012          |
| CKD                                                                                                 | 10.8% (1,412)                                                                | 16.2% (756)                                               | <0.001         |
| Diabetes                                                                                            | 32.3% (4,215)                                                                | 40.1% (1875)                                              | <0.001         |
| Heart failure                                                                                       | 7.3% (947)                                                                   | 18.1% (846)                                               | <0.001         |
| HTN                                                                                                 | 53.7% (7,008)                                                                | 66.3% (3098)                                              | <0.001         |
| CABG/PCI/MI                                                                                         | 8.0% (1,049)                                                                 | 12.8% (600)                                               | <0.001         |
| <b>Presenting Labs</b>                                                                              |                                                                              |                                                           |                |
| NT-proBNP (pg/mL)                                                                                   | <i>N/A</i>                                                                   | 299 (74.6 – 1608.0)                                       | <i>N/A</i>     |
| Creatinine (mg/dL)                                                                                  | 0.99 (0.77 – 1.37)                                                           | 1.1 (0.80 – 1.60)                                         | <0.001         |
| Troponin (ng/L)                                                                                     | 10.0 (0.0 – 30.0)                                                            | 20.0 (10.0 – 60.0)                                        | <0.001         |
| CRP (mg/L)                                                                                          | 51.7 (12.7 – 77.3)                                                           | 72.1 (21.0 – 135.5)                                       | <0.001         |
| Ferritin (ng/ml)                                                                                    | 547 (239 – 1121)                                                             | 586 (270 – 1169)                                          | 0.011          |
| D-Dimer (ng/ml)                                                                                     | 790 (395 – 1,504)                                                            | 1992 (420 – 1930)                                         | <0.001         |
| Procalcitonin (ng/ml)                                                                               | 0.14 (0.07 – 0.36)                                                           | 0.17 (0.08 – 0.52)                                        | <0.001         |

BMI: body mass index (kg/m<sup>2</sup>), CKD: chronic kidney disease, HTN: hypertension, CABG: coronary artery bypass graft, PCI: percutaneous intervention such as coronary stenting, MI: myocardial infarction, CRP: C-reactive protein.

**Table S2. Outcomes for Patients without Heart Failure Stratified by NT-proBNP.**

| <b><i>Patients Without Heart Failure</i></b><br>% ( <i>n</i> ) or<br>Median ( <i>Q</i> <sub>1</sub> – <i>Q</i> <sub>3</sub> ) | <b>Normal<br/>NT-pro-BNP</b><br>( <i>n</i> = 3,030) | <b>Elevated<br/>NT-pro-BNP</b><br>( <i>n</i> = 799) | <b>p-value</b> |
|-------------------------------------------------------------------------------------------------------------------------------|-----------------------------------------------------|-----------------------------------------------------|----------------|
| In-Hospital Mortality                                                                                                         | 16.1% (488)                                         | 38.0% (304)                                         | <0.001         |
| MACE                                                                                                                          | 19.7% (598)                                         | 47.2% (377)                                         | <0.001         |
| Intubation                                                                                                                    | 21.1% (640)                                         | 36.4% (291)                                         | <0.001         |
| ICU Admission                                                                                                                 | 33.1% (1002)                                        | 51.6% (412)                                         | <0.001         |
| Shock                                                                                                                         | 10.1% (307)                                         | 22.2% (177)                                         | <0.001         |
| Cardiac Arrest                                                                                                                | 5.5% (166)                                          | 11.9% (95)                                          | <0.001         |
| Time to Death<br>(days)                                                                                                       | 9.0 (5.0 – 16.0)                                    | 8.0 (3.0 – 16.0)                                    | 0.021          |

MACE: Major adverse cardiac events as defined as death, acute myocardial infarction, stroke, shock, new onset heart failure, or myocarditis, ICU: intensive care unit.

**Table S3. Univariable Logistical Regression Model for Patient Characteristics Predicting In-Hospital Mortality.**

| <i>In-Hospital Mortality</i>    | <i>Univariable Logistical Regression</i> |         |             |
|---------------------------------|------------------------------------------|---------|-------------|
|                                 | OR                                       | p-value | 95% CI      |
| Male                            | 1.24                                     | 0.003   | 1.08 – 1.43 |
| Age (per 10 years)              | 1.51                                     | <0.001  | 1.43 – 1.58 |
| BMI (kg/m <sup>2</sup> )        | 0.98                                     | <0.001  | 0.97 – 0.99 |
| Diabetes                        | 1.23                                     | 0.004   | 1.07 – 1.41 |
| Heart Failure                   | 1.56                                     | <0.001  | 1.32 – 1.85 |
| Hypertension                    | 1.55                                     | <0.001  | 1.33 – 1.81 |
| Creatinine (mg/dL)              | 1.12                                     | <0.001  | 1.09 – 1.15 |
| Elevated NT-pro-BNP             | 2.98                                     | <0.001  | 2.58 – 3.45 |
| Heart Rate (bpm)                | 1.01                                     | <0.001  | 1.00 – 1.01 |
| Systolic Blood Pressure (mmHg)  | 0.99                                     | <0.001  | 0.99 – 1.00 |
| Diastolic Blood Pressure (mmHg) | 0.98                                     | <0.001  | 0.98 – 0.99 |
| Respiration Rate (per minute)   | 1.04                                     | <0.001  | 1.03 – 1.05 |
| Need for Supplemental Oxygen    | 2.30                                     | <0.001  | 1.96 – 2.71 |

BMI: body mass index, CKD: chronic kidney disease, Heart Failure: previous diagnosis of heart failure, bpm: beats per minute, mmHg: millimeters of mercury. Univariable logistical regression model for individual factors influencing the odds ratio (OR) for in-hospital mortality, comparing Elevated to Normal NT-proBNP values, with 95% confidence interval (CI).

**Figure S1. Receiver Operator Characteristic Curves for Regression Models.**

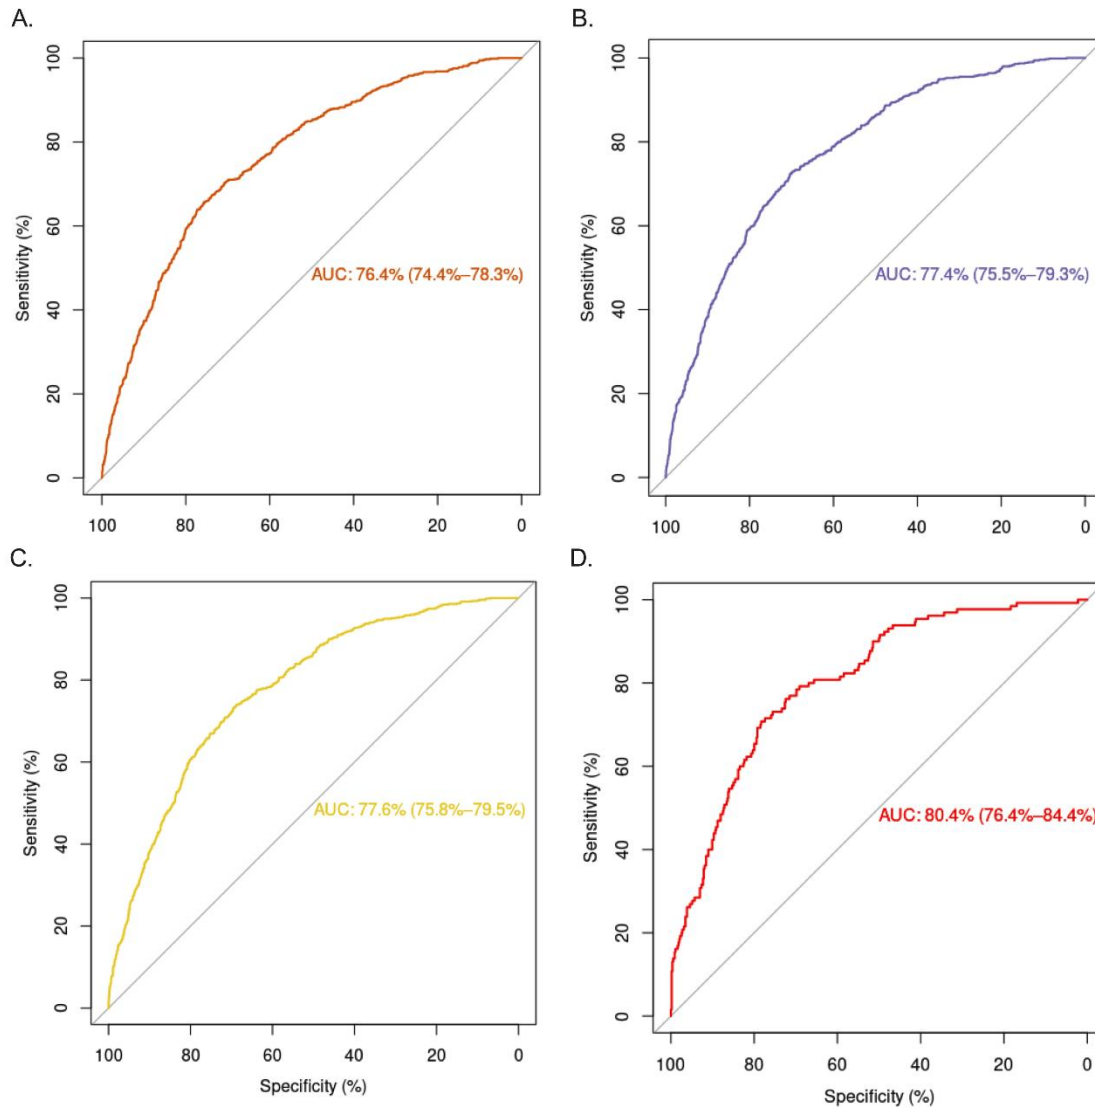

Receiver operator characteristic curves with the area under the curve (AUC) for multivariable logistical regression models with adjustments for age, BMI, sex, creatinine (mg/dL) and history of atrial fibrillation, chronic kidney disease, diabetes, hypertension, and previous heart failure diagnosis, in addition to presenting vital signs (heart rate, systolic and diastolic blood pressure, respiratory rate and need for supplemental oxygen). A. The model with elevated age-adjusted NT-proBNP levels: AUC of 0.764 (95% CI: 0.744 – 0.783) with a sensitivity of 65.80% and specificity of 75.51% (AUC without NT-proBNP: 0.749). B. The model with NT-proBNP in quintiles: AUC of 0.774 (95% CI: 0.755 – 0.793) with a sensitivity of 72.90% and specificity of 69.83% (AUC without NT-proBNP: 0.749). C. The model with log NT-proBNP: AUC of 0.776 (95% CI: 0.758 – 0.795) with a sensitivity of 73.33% and specificity of 69.43% (AUC without NT-proBNP: 0.749). D. The comprehensive model with log NT-proBNP and other biomarkers D-dimer (ng/ml), CRP (mg/L), procalcitonin (ng/ml), and troponin (ng/L): AUC of 0.804 (95% CI: 0.764 – 0.844) with a sensitivity of 70.77% and specificity of 78.31% (AUC without NT-proBNP: 0.789).
